# Supplementary material
Source: publisher figshare collection journal article supplement (https://wiley.figshare.com/articles/dataset/_/3559557)
Supplement: Supplementary file 1 [file 1]

**Michael Kalyuzhny, Yishai Schreiber, Rachel Chocron, Curtis H. Flather, Ronen Kadmon, David A. Kessler, and Nadav M. Shnerb. 2014. Temporal fluctuation scaling in populations and communities. *Ecology* #####.**

Appendix C. The alpha-beta-gamma model (see Fig. 2 in main text).

For a population starting with  $n_0$  individuals, we assume that the chance of an individual remaining "inactive" (not involved in a birth or death event) until the next census is  $\alpha$ . Accordingly, the number of inactive individuals  $k$  is taken from a binomial distribution,

$$P(k) = \binom{n_0}{k} \alpha^k (1 - \alpha)^{n_0 - k}.$$

An active individual dies with probability  $1 - \beta$  and give birth with probability  $\beta$ . To keep the population fixed (on average), every reproducing individual must produce on average  $1/\beta$  offspring. If, due to environmental noise, the population is growing or shrinking, the average number of offspring is  $(1 + \gamma)/\beta$ . We assume that  $\gamma$  is taken from a uniform distribution with zero mean and variance  $\Delta$ .

The actual number of offspring are taken to be integers drawn from a Poisson distribution with mean  $(1 + \gamma)/\beta$ . Therefore, the chance to census  $n_1$  individuals in the next census, given  $n_0$  in the current census, is

$$P(n_1 | n_0) = \sum_{k=0}^{n_0} \binom{n_0}{k} \alpha^k (1 - \alpha)^{n_0 - k} \sum_{s=0}^{n_0 - k} \binom{n_0 - k}{s} \beta^s (1 - \beta)^{n_0 - k - s} \frac{e^{-s \frac{(1+\gamma)}{\beta}} \left[ s \frac{(1+\gamma)}{\beta} \right]^{n_1 - k}}{(n_1 - k)!}$$

The average number in the next census,  $\bar{n}_1 = \sum_{n_1=0}^{\infty} n_1 P(n_1 | n_0)$ , may be calculated using

$$\sum_{n_1=k}^{\infty} n_1 \frac{\rho^{n_1 - k}}{(n_1 - k)!} = \rho \frac{\partial}{\partial \rho} \sum_{n_1=k}^{\infty} \frac{\rho^{n_1 - k}}{(n_1 - k)!} + k \sum_{n_1=k}^{\infty} \frac{\rho^{n_1 - k}}{(n_1 - k)!} = \rho \frac{\partial}{\partial \rho} e^{\rho} + k e^{\rho}$$

Where  $s \frac{(1+\gamma)}{\beta} = \rho$ . The result

$$\overline{n_1} = n_0\alpha + n_0(1 - \alpha)(1 + \gamma),$$

is as expected. Similarly

$$var(n_1) = n_0(1 - \alpha) \left[ \frac{(1 + \gamma)^2}{\beta} - \gamma(1 + \gamma) + \gamma^2\alpha \right]$$

Since  $\bar{\gamma} = 0$ ,

$$var(n_1) = \frac{n_0(1-\alpha)}{\beta} + \Delta n_0 \left[ \frac{(1-\alpha)}{\beta} - (1 - \alpha)^2 \right] + \Delta n_0^2(1 - \alpha)^2.$$

Defining the rescaled amplitude of fluctuation  $Y = \frac{n_1 - n_0}{\sqrt{n_0}}$ , its variance  $Var(Y) = \frac{var(n_1)}{n_0}$  is given by Eq. (3) of the main text. **Thus, for any process without environmental noise (no matter what the strength of demographic stochasticity  $\beta$ )  $Var(Y)$  will be independent of the initial population size.**
