# Supplementary material
Source: publisher figshare collection journal article supplement (https://wiley.figshare.com/articles/dataset/_/3559557)
Supplement: Supplementary file 2 [file 1 › appendix-C.htm]

Ecological Archives E095-148-A3


*Ecological Archives* E095-148-A3

Michael Kalyuzhny, Yishai Schreiber, Rachel Chocron, Curtis H. Flather, Ronen Kadmon, David A. Kessler, Nadav M. Shnerb. 2014. Temporal fluctuation scaling in populations and communities. *Ecology* 95:1701–1709. http://dx.doi.org/10.1890/13-0326.1

Appendix C. The alpha-beta-gamma model (see Fig. 2 in main text).

> View / download PDF.


---

[Back to E095-148]
